# Supplementary material
Source: publisher site journal article supplement (https://www.dovepress.com/article/415572)
Supplement: Supplementary file 1 [file get_supplementary_file.php]

Supplementary Table 1: Numbers of staff during the study period

|                                    | Pre<br>(April 1, 2012 to<br>March 31, 2014) | Post-1<br>(April 1, 2014 to<br>March 31, 2016) | Post-2<br>(April 1, 2016 to<br>March 31, 2018) | Post-3<br>(April 1, 2018 to<br>March 31, 2020) |
|------------------------------------|---------------------------------------------|------------------------------------------------|------------------------------------------------|------------------------------------------------|
| Neurologists                       | 5                                           | 5                                              | 5                                              | 5                                              |
| Neurosurgeons                      | 3-4                                         | 4                                              | 4                                              | 4                                              |
| Rehabilitation Doctors             | 1-2                                         | 2                                              | 1-2                                            | 2                                              |
| High Care Unit Nurses              | 43-45                                       | 46-48                                          | 44-45                                          | 47                                             |
| Paramedics                         | 2                                           | 2                                              | 2                                              | 1-2                                            |
| Therapists (Total)                 | 40-59                                       | 57-62                                          | 58-60                                          | 58-61                                          |
| Physical Therapists                | 20-29                                       | 30-31                                          | 31-32                                          | 31-32                                          |
| Occupational Therapists            | 12-19                                       | 16-19                                          | 16                                             | 17-19                                          |
| Speech-Language-Hearing Therapists | 8-11                                        | 11-12                                          | 11-12                                          | 10                                             |
| Dentists                           | 2                                           | 2-3                                            | 3                                              | 3                                              |
| Dental Hygienists                  | 2                                           | 2                                              | 2                                              | 2                                              |
