# Supplementary material
Source: publisher site journal article supplement (https://www.dovepress.com/article/415572)
Supplement: Supplementary file 2 [file get_supplementary_file.php]

Supplementary Table 2: Baseline demographic and clinical characteristics

|                                                                       | Overall:<br>April 1,<br>2012 to<br>March 31,<br>2020; N<br>(%) | Pre-test:<br>April 1,<br>2012 to<br>March 31,<br>2014; N<br>(%) | Post-1:<br>April 1,<br>2014 to<br>March 31,<br>2016; N<br>(%) | Post-2:<br>April 1,<br>2016 to<br>March 31,<br>2018; N<br>(%) | Post-3:<br>April 1,<br>2018 to<br>March 31,<br>2020; N<br>(%) | P-value               | Data<br>missing |
|-----------------------------------------------------------------------|----------------------------------------------------------------|-----------------------------------------------------------------|---------------------------------------------------------------|---------------------------------------------------------------|---------------------------------------------------------------|-----------------------|-----------------|
| Total admitted patients                                               | 103,591                                                        | 24,976                                                          | 26,755                                                        | 27,046                                                        | 24,814                                                        |                       | 0               |
| Stroke patients (% of total)                                          | 2,771 (2.7)                                                    | 632 (2.5)                                                       | 642 (2.4)                                                     | 716 (2.6)                                                     | 781 (3.1)                                                     | <0.0001 <sup>a</sup>  | 0               |
| Sex (male)                                                            | 1,527 (55.1)                                                   | 341 (54.0)                                                      | 354 (55.1)                                                    | 382 (53.4)                                                    | 450 (57.6)                                                    | 0.359                 | 0               |
| Age (years)                                                           |                                                                |                                                                 |                                                               |                                                               |                                                               |                       | 0               |
| 18-59                                                                 | 436 (15.7)                                                     | 111 (17.6)                                                      | 72 (11.2)                                                     | 129 (18.0)                                                    | 124 (15.9)                                                    | <0.01 <sup>b</sup>    |                 |
| 60-69                                                                 | 621 (22.4)                                                     | 165 (26.1)                                                      | 154 (24.0)                                                    | 153 (21.4)                                                    | 149 (19.1)                                                    | <0.05 <sup>c</sup>    |                 |
| 70-79                                                                 | 815 (29.4)                                                     | 173 (27.4)                                                      | 194 (30.2)                                                    | 202 (28.2)                                                    | 246 (31.5)                                                    | 0.308                 |                 |
| 80-89                                                                 | 715 (25.8)                                                     | 150 (23.7)                                                      | 179 (27.9)                                                    | 184 (25.7)                                                    | 202 (25.9)                                                    | 0.413                 |                 |
| ≥90                                                                   | 184 (6.6)                                                      | 33 (5.2)                                                        | 43 (6.7)                                                      | 48 (6.7)                                                      | 60 (7.7)                                                      | 0.330                 |                 |
| Stroke subtype                                                        |                                                                |                                                                 |                                                               |                                                               |                                                               | 0.056                 | 0               |
| Cerebral infarction                                                   | 1,662 (60.0)                                                   | 366 (57.9)                                                      | 377 (58.7)                                                    | 421 (58.8)                                                    | 498 (63.8)                                                    |                       |                 |
| Cerebral hemorrhage                                                   | 830 (30.0)                                                     | 187 (29.6)                                                      | 196 (30.5)                                                    | 232 (32.4)                                                    | 215 (27.5)                                                    |                       |                 |
| Non-traumatic subarachnoid hemorrhage                                 | 279 (10.1)                                                     | 79 (12.5)                                                       | 69 (10.7)                                                     | 63 (8.8)                                                      | 68 (8.7)                                                      |                       |                 |
| Residence prior to admission: Home                                    | 2,617 (94.4)                                                   | 599 (94.8)                                                      | 598 (93.1)                                                    | 677 (94.6)                                                    | 743 (95.1)                                                    | 0.373                 | 0               |
| Body mass index (kg/m <sup>2</sup> )                                  |                                                                |                                                                 |                                                               |                                                               |                                                               |                       | 44              |
| <18.5                                                                 | 253 (9.1)                                                      | 59 (9.3)                                                        | 58 (9.0)                                                      | 75 (10.5)                                                     | 61 (7.8)                                                      | 0.356                 |                 |
| 18.5-24.9                                                             | 1,780 (64.2)                                                   | 404 (63.9)                                                      | 438 (68.2)                                                    | 446 (62.3)                                                    | 492 (63.0)                                                    | 0.103                 |                 |
| ≥25.0                                                                 | 738 (26.6)                                                     | 169 (26.7)                                                      | 146 (22.7)                                                    | 195 (27.2)                                                    | 228 (29.2)                                                    | 0.052                 |                 |
| Japan coma scale                                                      |                                                                |                                                                 |                                                               |                                                               |                                                               | 0.420                 | 0               |
| 0, 1-2 digit codes<br>(clear to moderate consciousness<br>impairment) | 2,355 (85.0)                                                   | 529 (83.7)                                                      | 538 (83.8)                                                    | 616 (86.0)                                                    | 672 (86.0)                                                    |                       |                 |
| 3-digit code<br>(severe consciousness impairment)                     | 416 (15.0)                                                     | 103 (16.3)                                                      | 104 (16.2)                                                    | 100 (14.0)                                                    | 109 (14.0)                                                    |                       |                 |
| Medical history                                                       |                                                                |                                                                 |                                                               |                                                               |                                                               |                       | 0               |
| Previous stroke                                                       | 466 (16.8)                                                     | 123 (19.5)                                                      | 130 (20.2)                                                    | 93 (13.0)                                                     | 120 (15.4)                                                    | P<0.001 <sup>d</sup>  |                 |
| Hypertension                                                          | 2,256 (81.4)                                                   | 487 (77.1)                                                      | 515 (80.2)                                                    | 589 (82.3)                                                    | 665 (85.1)                                                    | <0.01 <sup>e</sup>    |                 |
| Diabetes                                                              | 828 (29.9)                                                     | 184 (29.1)                                                      | 206 (32.1)                                                    | 205 (28.6)                                                    | 233 (29.8)                                                    | 0.531                 |                 |
| Dyslipidemia                                                          | 829 (29.9)                                                     | 195 (30.9)                                                      | 188 (29.3)                                                    | 208 (29.1)                                                    | 238 (30.5)                                                    | 0.860                 |                 |
| Respiratory disease                                                   | 470 (17.0)                                                     | 67 (10.6)                                                       | 119 (18.5)                                                    | 161 (22.5)                                                    | 123 (15.7)                                                    | P<0.0001 <sup>f</sup> |                 |
| Dementia                                                              | 238 (8.6)                                                      | 45 (7.1)                                                        | 63 (9.8)                                                      | 63 (8.8)                                                      | 67 (8.6)                                                      | 0.391                 |                 |
| Heart failure                                                         | 215 (7.8)                                                      | 51 (8.1)                                                        | 45 (7.0)                                                      | 61 (8.5)                                                      | 58 (7.4)                                                      | 0.732                 |                 |
| Renal failure                                                         | 178 (6.4)                                                      | 43 (6.8)                                                        | 46 (7.2)                                                      | 41 (5.7)                                                      | 48 (6.1)                                                      | 0.701                 |                 |
| Liver disease                                                         | 198 (7.1)                                                      | 35 (5.5)                                                        | 61 (9.5)                                                      | 43 (6.0)                                                      | 59 (7.6)                                                      | 0.024 <sup>g</sup>    |                 |

All comparisons used the Pearson's chi-square test, and multiple comparisons used Bonferroni's adjustment.

a) P<0.0001: Pre vs. Post-3, Post-1 vs. Post-3; P<0.001: Post-2 vs. Post-3

b) P=0.001: Pre vs. Post-1, P<0.001: Post-1 vs. Post-2

c) P=0.002: Pre vs. Post-3

d) P=0.001: Pre vs. Post-2, P<0.001: Post-1 vs. Post-2

e) P<0.0001: Pre vs. Post-3

f) P<0.0001: Pre vs. Post-1, Post-2; P=0.004: Pre vs. Post-3; P=0.001: Post-2 vs. Post-3

g) P=0.008: Pre vs. Post-1
